# Supplementary material
Source: HighWire-hosted journal article supplement (https://www.ajnr.org/highwire/filestream/95911/field_highwire_adjunct_files/0/0819.pdf)
Supplement: 0819.pdf [file 0819.pdf]

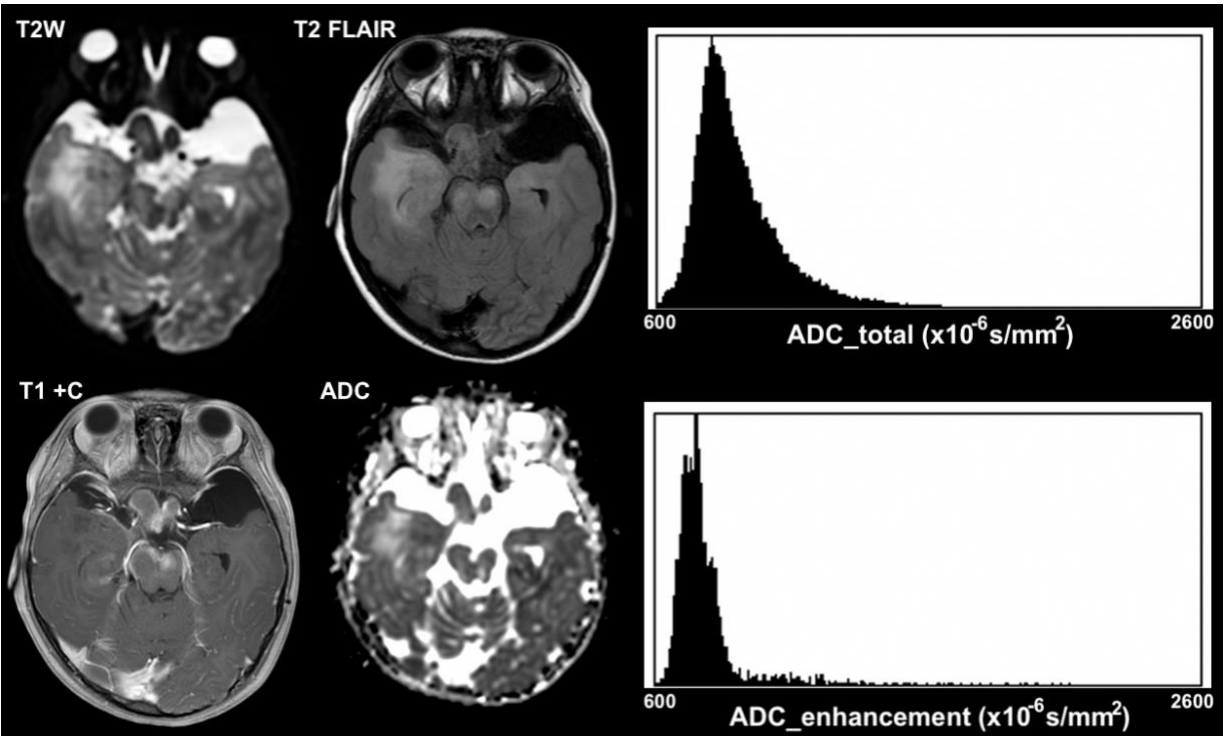

Supplemental Figure 1A: Supplemental Figure 1A shows baseline images and ADC histograms of a 4-year-old girl with a sporadic optic pathway glioma (Stratum 4) who showed disease progression at 1.65 months while on treatment. ADC\_total skewness and kurtosis were high, measuring 1.94 and 6.40 respectively, and ADC\_enhancement skewness and kurtosis were high, measuring 3.57 and 14.27 respectively.

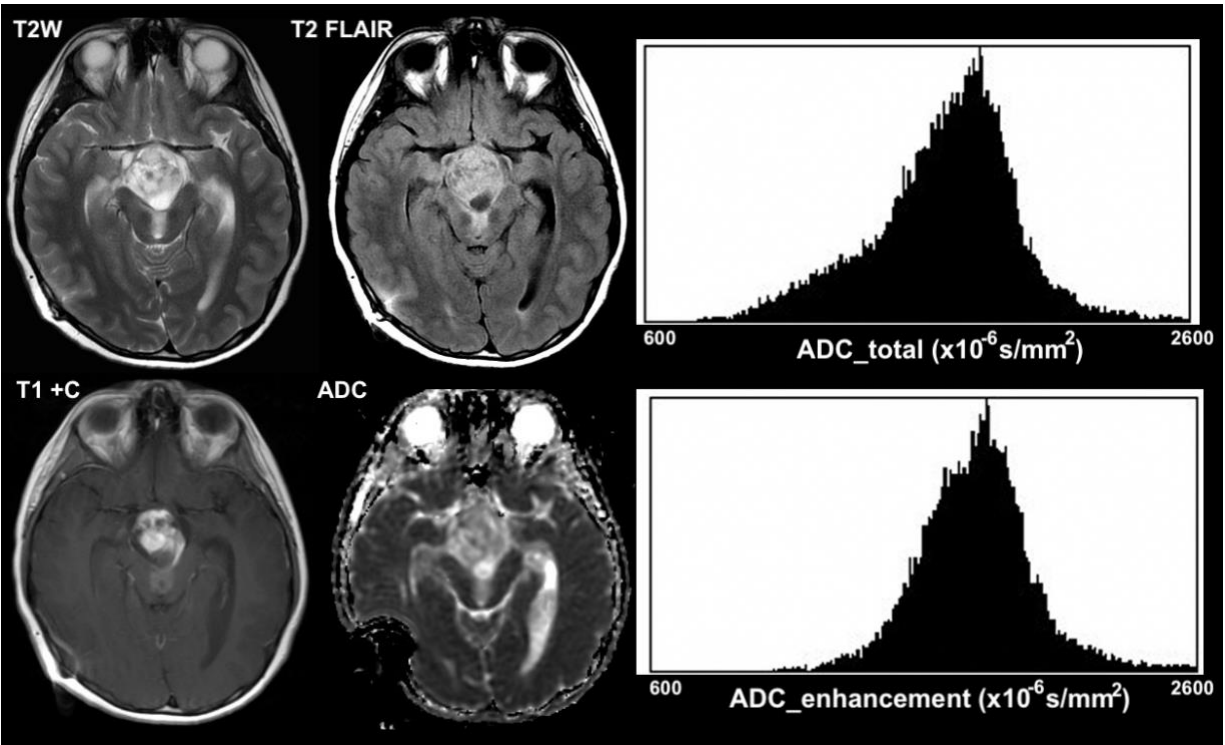

Supplemental Figure 1B: Supplemental Figure 1B shows a 12-year-old boy with a sporadic optic pathway glioma (Stratum 4) with PFS of 57.5 months. Skewness and kurtosis of ADC\_total were lower, measuring 0.25 and 0.3 respectively, and skewness and kurtosis of ADC\_enhancement were also considerably lower in this patient with longer PFS, measuring 0.13 and 1.23 respectively.
